# Supplementary material
Source: PubMed Central journal article supplement (PMC3463217)
Supplement: supp_mol.112.080085_SUPPLEMENTALFIGandTable.pdf [file supp_mol.112.080085_SUPPLEMENTALFIGandTable.pdf]

**CYP4V2 in Bietti's Crystalline Dystrophy: Ocular Localization, Metabolism of  $\omega$ -3 PUFAs and Functional Deficit of the H331P Variant**

Mariko Nakano, Edward J. Kelly, Constanze Wiek, Helmut Hanenberg and Allan E. Rettie

Supplemental Table 1. GC-EI/MS analysis of lipid profiling.

|              | Name of compounds                                       | Monitored ion (m/z) | Retention time (min) |
|--------------|---------------------------------------------------------|---------------------|----------------------|
| d2-C18:0     | 2,2-d2-Stearic acid                                     | 300                 | 21.30                |
| C14:0        | Tetradecanoic acid/Myristic acid                        | 199                 | 13.86                |
| C16:0        | Hexadecanoic acid/Palmitic acid                         | 239                 | 17.77                |
| C16:1        | 9-cis-Hexadecenoic acid/cis-9 Palmitoleic acid          | 237                 | 17.36                |
| C18:0        | Octadecanoic acid/Stearic acid                          | 255                 | 21.30                |
| C18:1 cis-9  | 9-cis-Octadecenoic acid/cis-9 Oleic acid                | 265                 | 20.91                |
| C18:1 cis-11 | cis-11 Vaccenic acid                                    | 265                 | 21.01                |
| C20:4        | cis-5, 8, 11, 14-eicosatetraenoic acid/arachidonic acid | 79                  | 23.66                |
| C20:5        | Eicosapentaenoic acid/timnodonic acid                   | 79                  | 23.57                |
| C22:6        | Docosahexaenoic acid/cervonic acid                      | 79                  | 27.65                |

Supplemental Table 2. CYP4V2 expression in normal human tissues.

| Staining intensity       | Tissue                           | Staining pattern                                                                          | Supplemental figure 3 |
|--------------------------|----------------------------------|-------------------------------------------------------------------------------------------|-----------------------|
| Strong positive          | Liver                            | hepatocytes (2-3+)                                                                        | a<br>b<br>c           |
|                          | Pancreas                         | islet cells(4+); acinar cells(1-2+)                                                       |                       |
|                          | Hypophysis                       | endothelium(3+), small vessels(3+)                                                        |                       |
|                          | Uterus                           | glandular epithelium(2-4+)                                                                |                       |
|                          | Prostate                         | endothelium(4+), gland cells(3+)<br>endothelial cells(2-3+), interstitial capillaries(3+) |                       |
| Positive                 | Adrenal gland                    | endothelium(3+), seminiferous tubules(2+)                                                 | d<br><br>e<br>f       |
|                          | Testis                           | endothelium(3+), small vessels(3+)                                                        |                       |
|                          | Parathyroid                      | duct(2+), endothelium, small vessels(4+)                                                  |                       |
|                          | Breast                           | endothelium(2+), capsule(2+)                                                              |                       |
|                          | Tonsil                           | muscle(2+)                                                                                |                       |
|                          | Esophagus                        | glandular cells(3+), endothelium(2+)                                                      |                       |
|                          | Stomach                          | Granulium layer(2+), endothelium(3+)                                                      |                       |
| Weak positive            | Cerebrum (Cerebral gray matter)  | endothelium(2+), vessels(2+)                                                              |                       |
|                          | Cerebrum (Cerebral white matter) | endothelium(2+), vessels(2+)                                                              |                       |
|                          | Cerebellum                       | endothelium(2+), vessels(2+)                                                              |                       |
|                          | Spleen                           | overall staining (no specific pattern)                                                    |                       |
|                          | Bone                             | overall staining (no specific pattern)                                                    |                       |
|                          | Lung                             | overall staining (no specific pattern)                                                    |                       |
|                          | Heart                            | endothelium(2+)                                                                           |                       |
|                          | Kidney                           | glomeruli (-), proximal tubules(2+)                                                       |                       |
|                          | Salivary                         | glandular cells(2-3+)                                                                     |                       |
|                          | Uterine cervix                   | endothelium(2+)                                                                           |                       |
|                          | Striated muscle                  | overall staining (no specific pattern)                                                    |                       |
|                          | Larynx                           | epithelium(2+), glands(2+), endothelium(2+)                                               |                       |
|                          | Negative                         | Thyroid                                                                                   |                       |
|                          |                                  | Ovary                                                                                     |                       |
|                          |                                  | Thymus gland                                                                              |                       |
| Intestine                |                                  |                                                                                           |                       |
| Colon                    |                                  |                                                                                           |                       |
| Nerve (Peripheral nerve) |                                  |                                                                                           |                       |
| Lung                     |                                  |                                                                                           |                       |

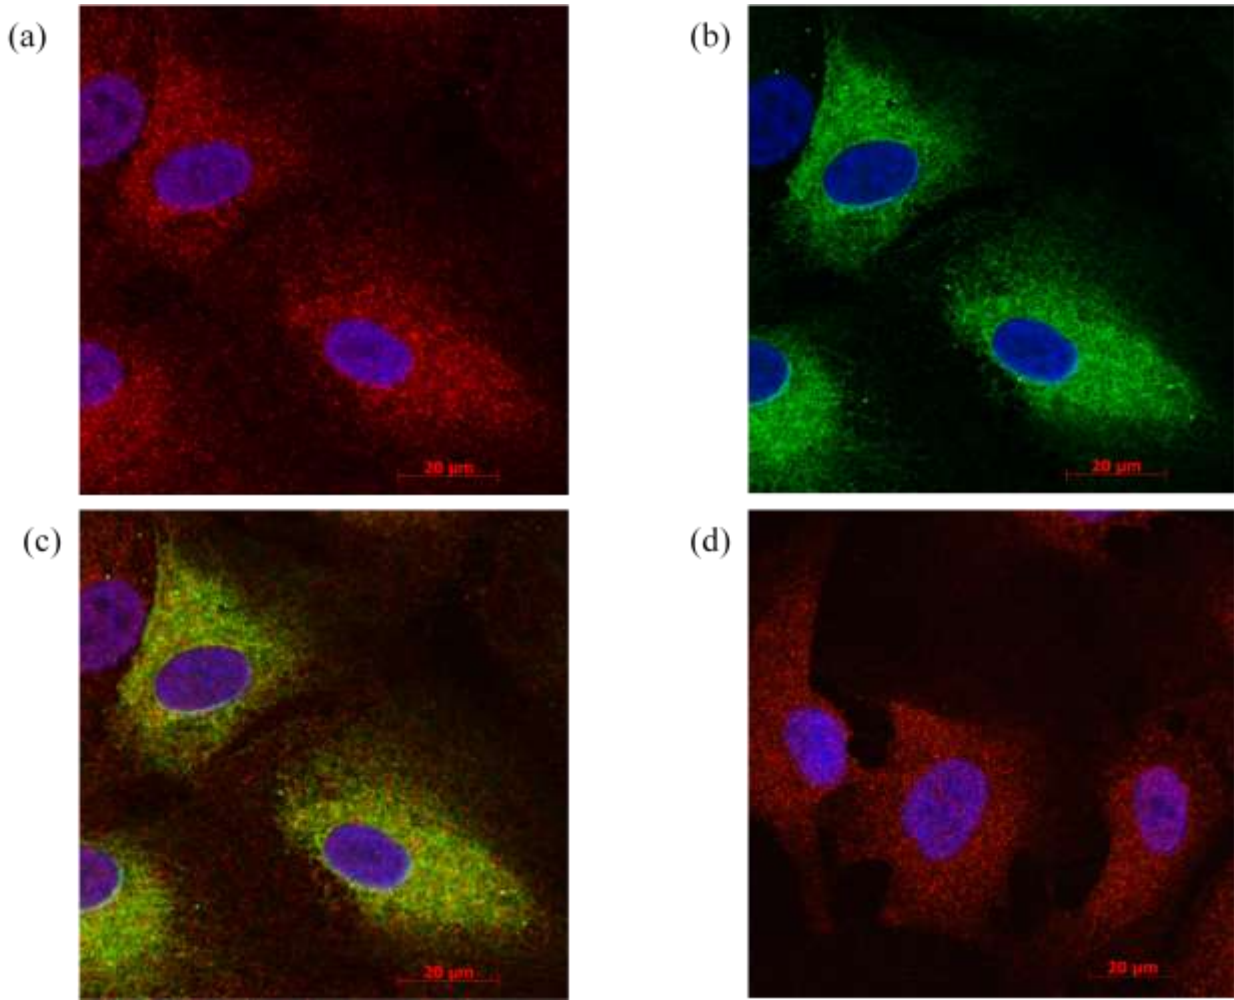

Supplemental Figure 1. Immunocytochemical analysis of CYP4V2 expressed in ARPE-19 cells. Immunofluorescence staining revealed that CYP4V2 protein was co-localized in the ER with calreticulin. DAPI (blue) was used for counter-staining. (a) Calreticulin expression is shown in red. (b) CYP4V2 expression is shown in green. (c) Overlay of (a) and (b). (d) Overlay of preimmune IgG-treated samples.

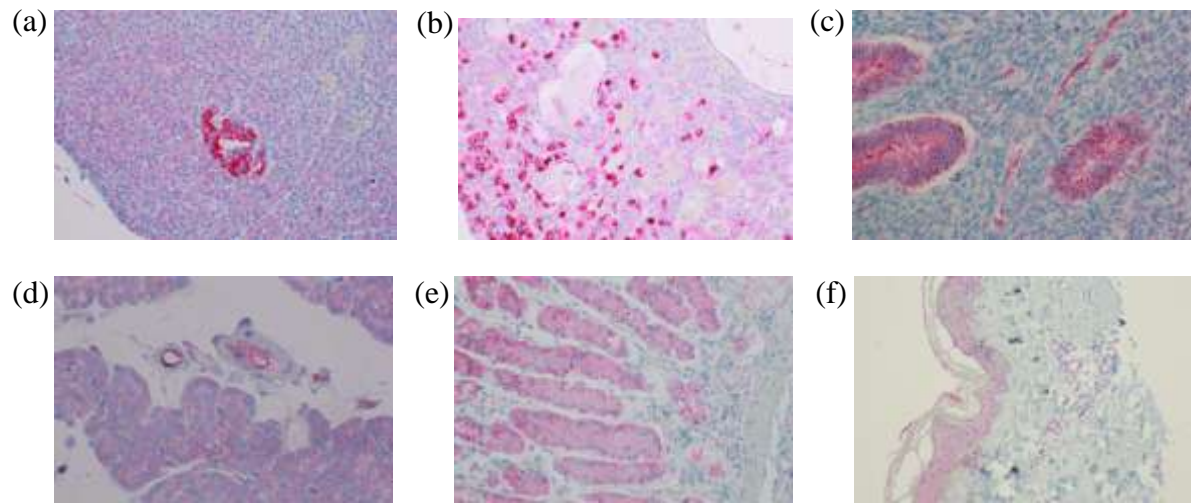

Supplemental Figure 2. CYP4V2 expression in the normal human tissues. Immunohistochemical staining corresponds to Supplemental Table 2.

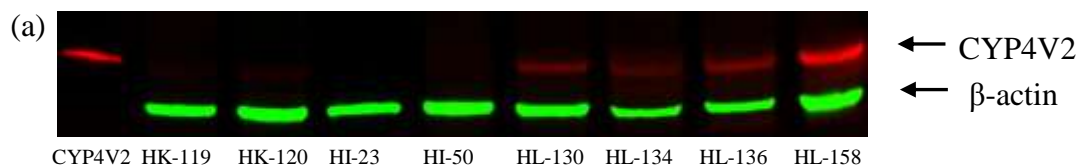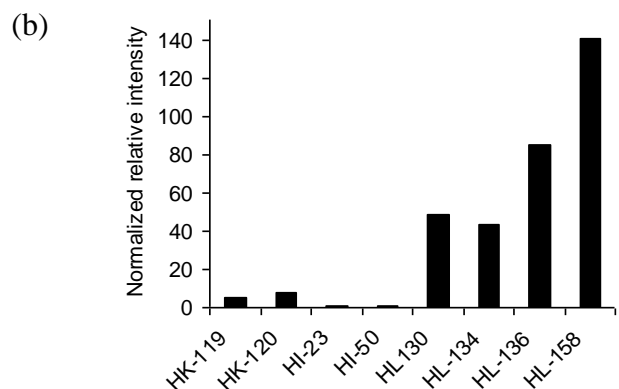

Supplemental Figure 3. CYP4V2 expression in drug metabolizing organs. (a) CYP4V2 expression level in 50  $\mu$ g of kidney (HK), small intestine (HI) and liver (HL) microsomes was determined by Western blot. The red color indicates CYP4V2, and the green color indicates  $\beta$ -actin. The band at the far right is purified CYP4V2. (b) The relative CYP4V2 expression level normalized to  $\beta$ -actin. This demonstrates that human liver expresses CYP4V2 at a moderate level with pronounced inter-individual differences.

|         |     |                         |                          |                      |                 |     |
|---------|-----|-------------------------|--------------------------|----------------------|-----------------|-----|
| CYP4A11 | 287 | RHLDFLDILLAKMENGSI      | LDKDLRAEVDTFMFEGHDTTASGI | SWILYALATHPKHQERCREE | IHSLL           | 355 |
| CYP4B1  | 282 | RHLDFLDILLGARDEDDIKLS   | DADLRAEVDTFMFEGHDTTTS    | GI SWFLYCMALY        | PEHQHRCREEVREIL | 350 |
| CYP4F2  | 294 | KILDFI DVLLL SKDEDGKKLS | EDIRAEADTFMFEGHDTTAS     | GL SWVLYHLAKH        | PEYQERCRQEVQELL | 362 |
| CYP4F3B | 294 | KILDFI DVLLL SKDEDGKKLS | EDIRAEADTFMFEGHDTTAS     | GL SWVLYHLAKH        | PEYQERCRQEVQELL | 362 |
| CYP4F12 | 294 | KILDFI DVLLL SKDEDGKALS | EDIRAEADTFMFGGHDTTAS     | GL SWVLYNLAH         | PEYQERCRQEVQELL | 362 |
| CYP4V2  | 295 | KRR AFLDLLSVIDDEGNRLS   | HEDIRAEVDTFMFEGHDTTAA    | AINWSLYLIGSN         | PEVQKKVDHELDVVF | 363 |

331

Supplemental Figure 4. Highly conserved region in the I-helix of CYP4 enzymes.
